# Supplementary material for: Conformational Dynamics of the Receptor-Binding Domain of the SARS-CoV-2 Spike Protein
Source: MDPI journal article supplement (doi:10.3390/biomedicines10123233), 2022-12-12
Supplement: s1 [file s1]

# Conformational dynamics of the receptor-binding domain of the SARS-CoV-2 spike protein

Aleksandra A. Mamchur<sup>1</sup>, Tatiana B. Stanishneva-Konovalova<sup>2</sup>, Yuliana A. Mokrushina<sup>3</sup>,  
Viktoria A. Abrikosova<sup>3</sup>, Yu Guo<sup>4</sup>, Hongkai Zhang<sup>4</sup>, Stanislav S. Terekhov<sup>3</sup>, Ivan V. Smirnov<sup>3</sup>  
and Igor A. Yaroshevich<sup>1,3,\*</sup>

<sup>1</sup> Department of biophysics, Faculty of Biology, Lomonosov Moscow State University, Moscow 119991, Russia

<sup>2</sup> Department of bioengineering, Faculty of Biology, Lomonosov Moscow State University, Moscow 119991, Russia

<sup>3</sup> Shemyakin-Ovchinnikov Institute of Bioorganic Chemistry, Russian Academy of Sciences, Moscow 117997, Russia

<sup>4</sup> State Key Laboratory of Medicinal Chemical Biology, College of Pharmacy, Nankai University, Tianjin 300071, China

\* Correspondence: iyapromo@gmail.com

## Supplementary information

### Computational workflow details

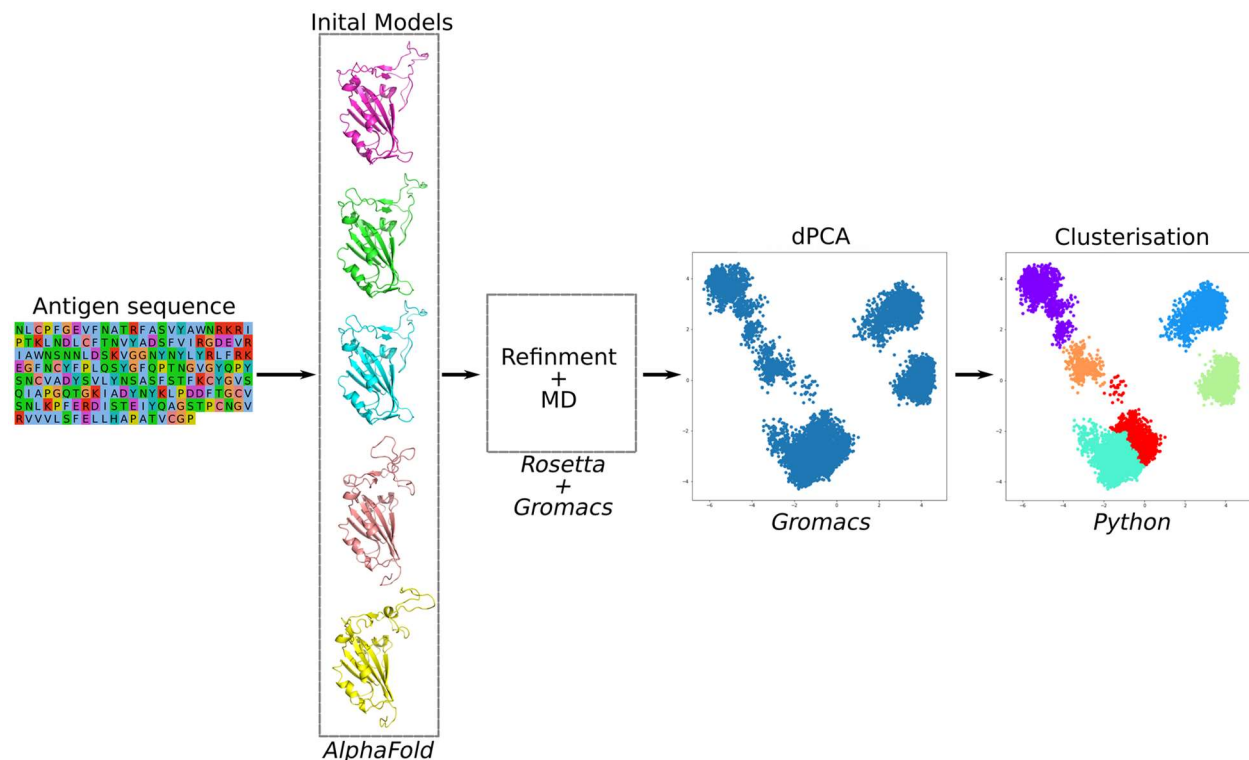

SI Figure S1. Representation of the computational workflow

### Used amino acid sequences

Text S1. WT RBD amino acid sequence

LCPFGGEVFNATRFASVYAWNRRKRISNCVADYSVLVNSASFSTFKCYGVSP TKLNDLCFTNVYADSFV  
IRGDEVQRQIAPGQTGKIADYNYKL PDDFTGCVIAWNSNNLDSKVGGNYYLYRLFRKSNLKPFE  
DISTEIYQAGSTPCNGVEGFNCYFPLQSYGFQPTNGVGYQPYRVVVL SFELLHAPATVCGP

Text S2. Omicron RBD amino acid sequence

LCPFDEVFNATRFASVYAWNRRKRISNCVADYSVLVNLAPFFTFKCYGVSP TKLNDLCFTNVYADSF  
VIRGDEVQRQIAPGQTGNIADYNYKL PDDFTGCVIAWNSNKLDSKVSGNYYLYRLFRKSNLKPFE  
RISTEIYQAGNKPCNGVAGFNCFPLRSYSFRPTYGVGHQPYRVVVL SFELLHAPATVCGP

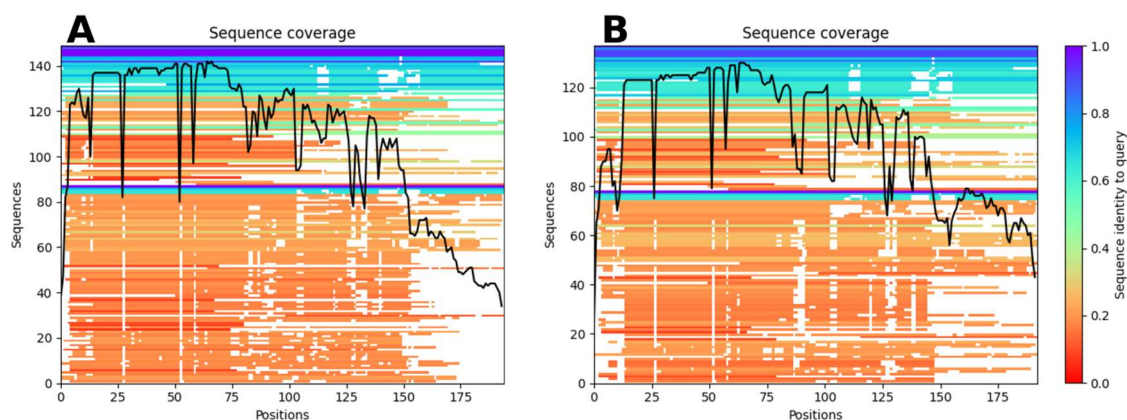

SI Figure S2. Sequence coverage for the modeling of WT (A) and OM (B) variants of RBD using Alpha Fold II.

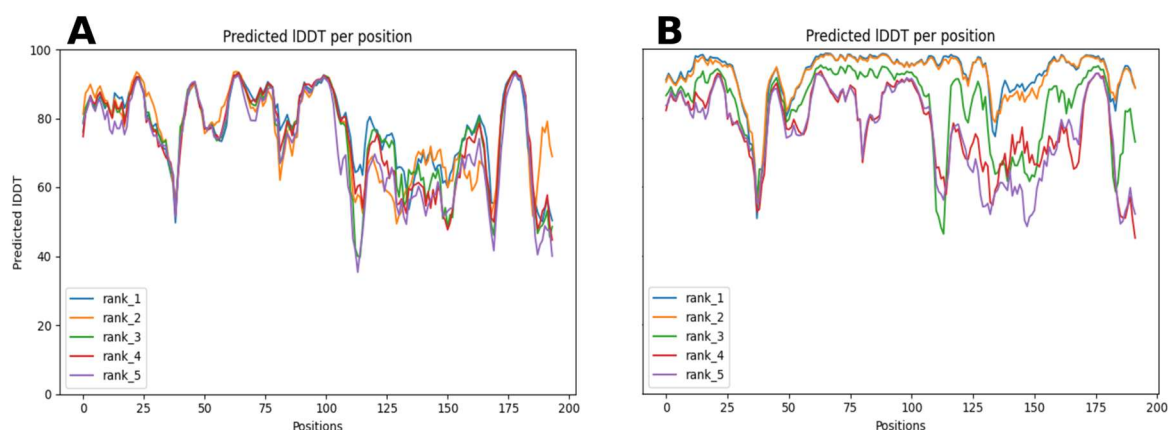

SI Figure S3. pLDDT score for five top ranking models obtained with Alpha Fold II for WT (A) and OM (B) variants of RBD.

### Rosetta repack protocol details

Text S3. Rosetta repack protocol options

```
<ROSETTASCRIPTS>
  <SCOREFXNS>
  </SCOREFXNS>
  <TASKOPERATIONS>
    <InitializeFromCommandline name="ifcl" />
    <RestrictToRepacking name="rtr" />
  </TASKOPERATIONS>
  <FILTERS>
  </FILTERS>
  <MOVERS>
    <
      PackRotamersMover name="repack"
      scorefxn="REF2015" task_operations="ifcl,rtr"
    />
    <
      MinMover name="minimize_sc"
      scorefxn="REF2015"
      chi="1" bb="0"
      jump="0"
      type="dfpmin_armijo_nonmonotone"
      tolerance="0.0001"
    />
  </MOVERS>
</ROSETTASCRIPTS>
```

```

    />
  </MOVERS>
  <APPLY_TO_POSE>
</APPLY_TO_POSE>
  <PROTOCOLS>
    <Add mover="repack" />
    <Add mover="minimize_sc" />
  </PROTOCOLS>
</ROSETTASCRIPTS>

```

**#Rosetta repack options#:**

```

-in:file:fullatom
-out:file:fullatom
-linmem_ig 10
-ex1
-ex2
-use_input_sc
-score:weights ref2015.wts

```

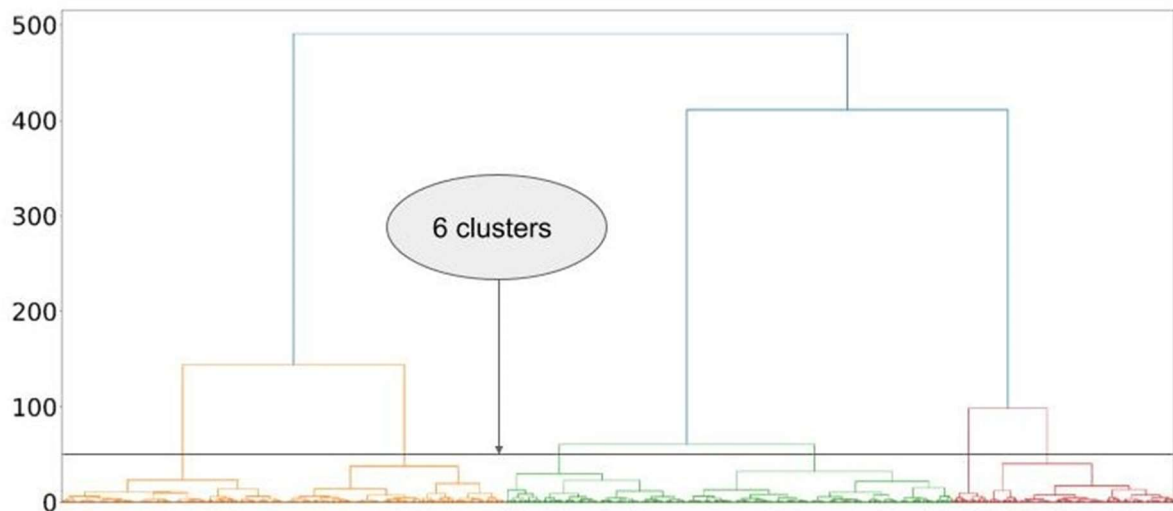

*SI Figure S4. Results of clusterization of the WT trajectory in the basis of principal components. Cut-off line is added.*

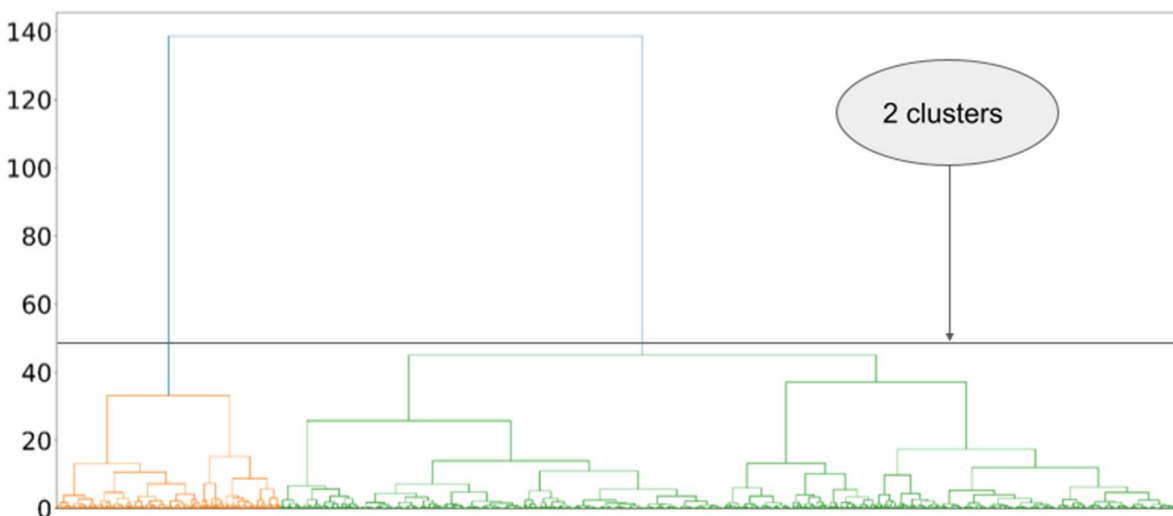

*SI Figure S5. Results of clusterization of the omicron trajectory in the basis of principal components. Cut-off line is added.*

*SI Table S1. Description of RBD structures from Protein Data Bank*

| <b>PDB code</b> | <b>Description</b>                                            | <b>Method</b>        | <b>Resolution</b> |
|-----------------|---------------------------------------------------------------|----------------------|-------------------|
| 6acd            | SARS-CoV spike glycoprotein in complex with ACE2              | Cryo-EM              | 3.90 Å            |
| 7cjk            | SARS-CoV-2 RBD in complex with a neutralizing antibody P4A1   | X-RAY<br>DIFFRACTION | 2.11 Å            |
| 7e3k            | SARS-CoV-2 RBD in complex with a neutralizing antibody 13G9   | Cryo-EM              | 3.90 Å            |
| 7m6d            | SARS-CoV-2 RBD in complex with neutralizing antibodies CR3022 | X-RAY<br>DIFFRACTION | 3.10 Å            |

*3D-structures for obtained clusters centroids are available upon request.*
